# Supplementary material for: Tumor microenvironment-activatable Fe-doxorubicin preloaded amorphous CaCO3 nanoformulation triggers ferroptosis in target tumor cells
Source: PubMed Central journal article supplement — Sci Adv. 2020 Apr 29;6(18):eaax1346. doi: 10.1126/sciadv.aax1346 (PMC7190311; doi:10.1126/sciadv.aax1346), 2020-04-29
Supplement: aax1346_SM.pdf [file aax1346_SM.pdf]

## Supplementary Materials for

### **Tumor microenvironment-activatable Fe-doxorubicin preloaded amorphous CaCO<sub>3</sub> nanoformulation triggers ferroptosis in target tumor cells**

Chen-Cheng Xue, Meng-Huan Li, Yang Zhao, Jun Zhou, Yan Hu, Kai-Yong Cai, Yanli Zhao, Shu-Hong Yu\*, Zhong Luo\*

\*Corresponding author. Email: [shyu@ustc.edu.cn](mailto:shyu@ustc.edu.cn) (S.-H.Y.); [luozhong918@cqu.edu.cn](mailto:luozhong918@cqu.edu.cn) (Z.L.)

Published 29 April 2020, *Sci. Adv.* **6**, eaax1346 (2020)

DOI: 10.1126/sciadv.aax1346

#### **This PDF file includes:**

Figs. S1 to S11

## Supplementary Materials

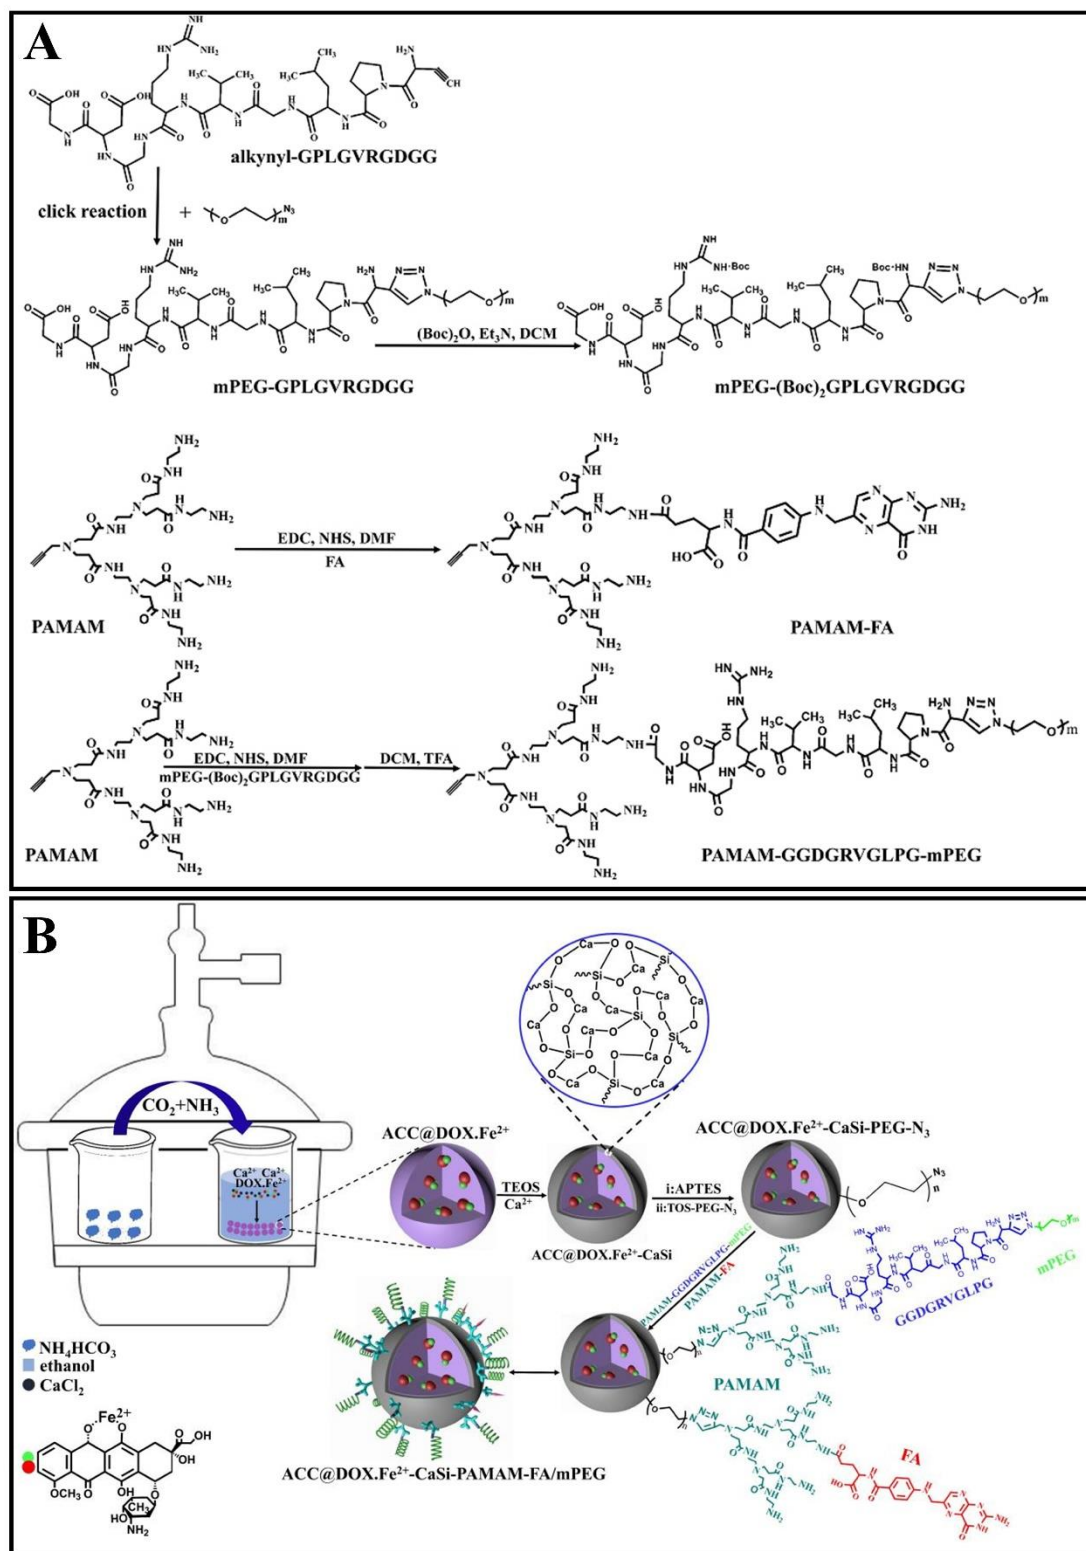

**Fig. S1. Synthesis scheme for the key components of the ACC-based nanoformulation.** A: The synthetic route of PAMAM-FA and PAMAM-GGDGRVGLPG-mPEG. B: The synthetic route of ACC@DOX.Fe<sup>2+</sup>-CaSi-PAMAM-FA/mPEG.

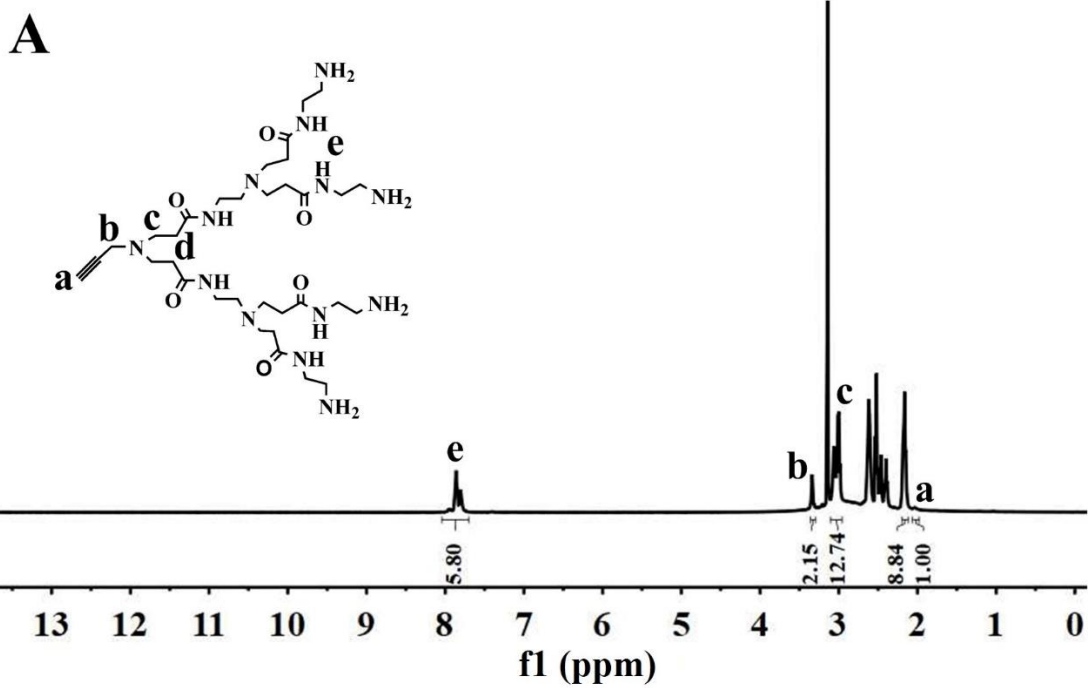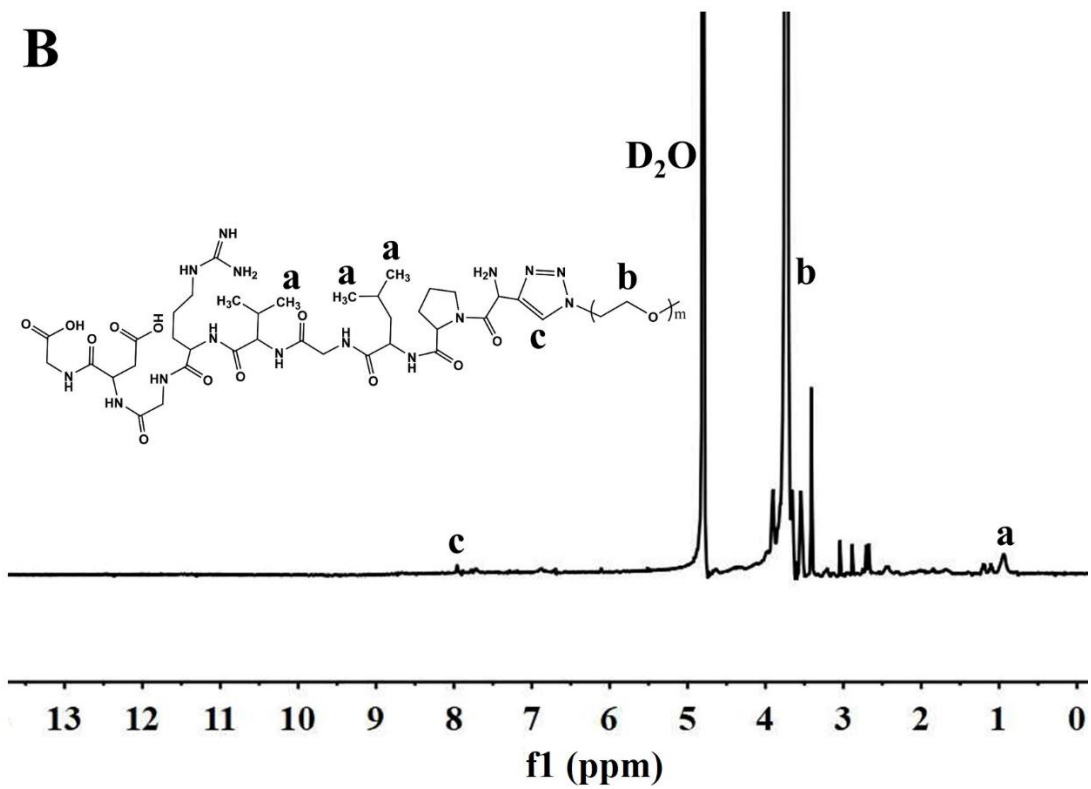

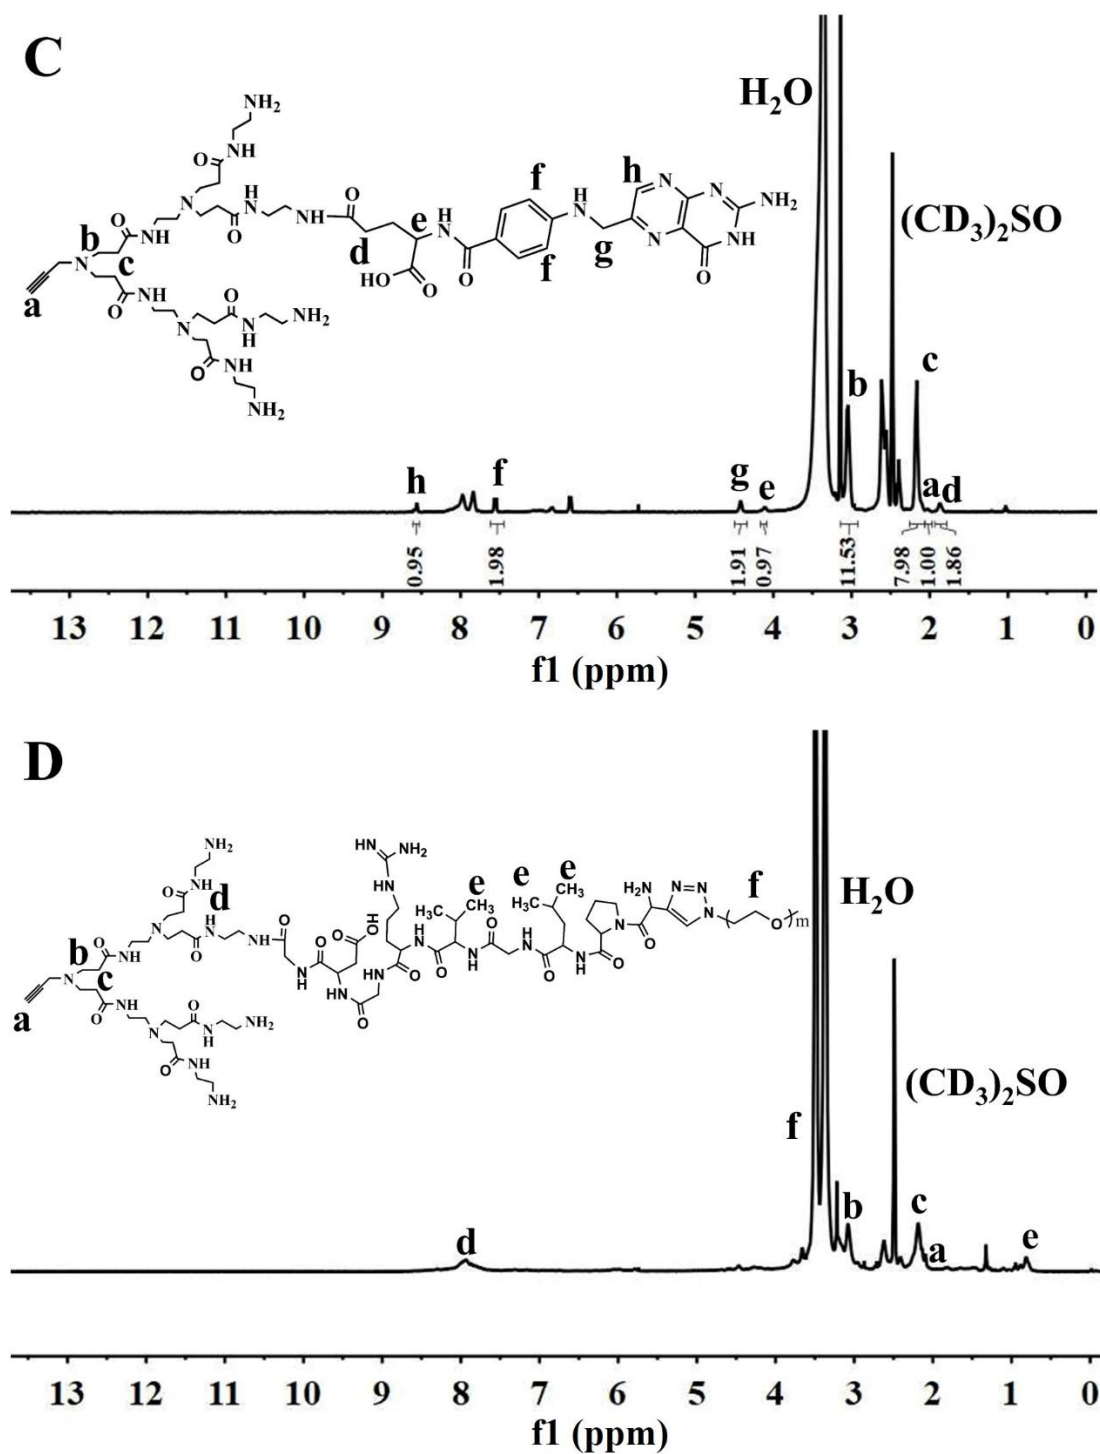

**Fig. S2. NMR spectra of the key intermediate products.**  $^1\text{H}$  NMR spectra of (A): PAMAM, (B): mPEG-GPLGVRGDGG, (C): PAMAM-FA, (D): PAMAM-GGDGRVGLPG-mPEG.

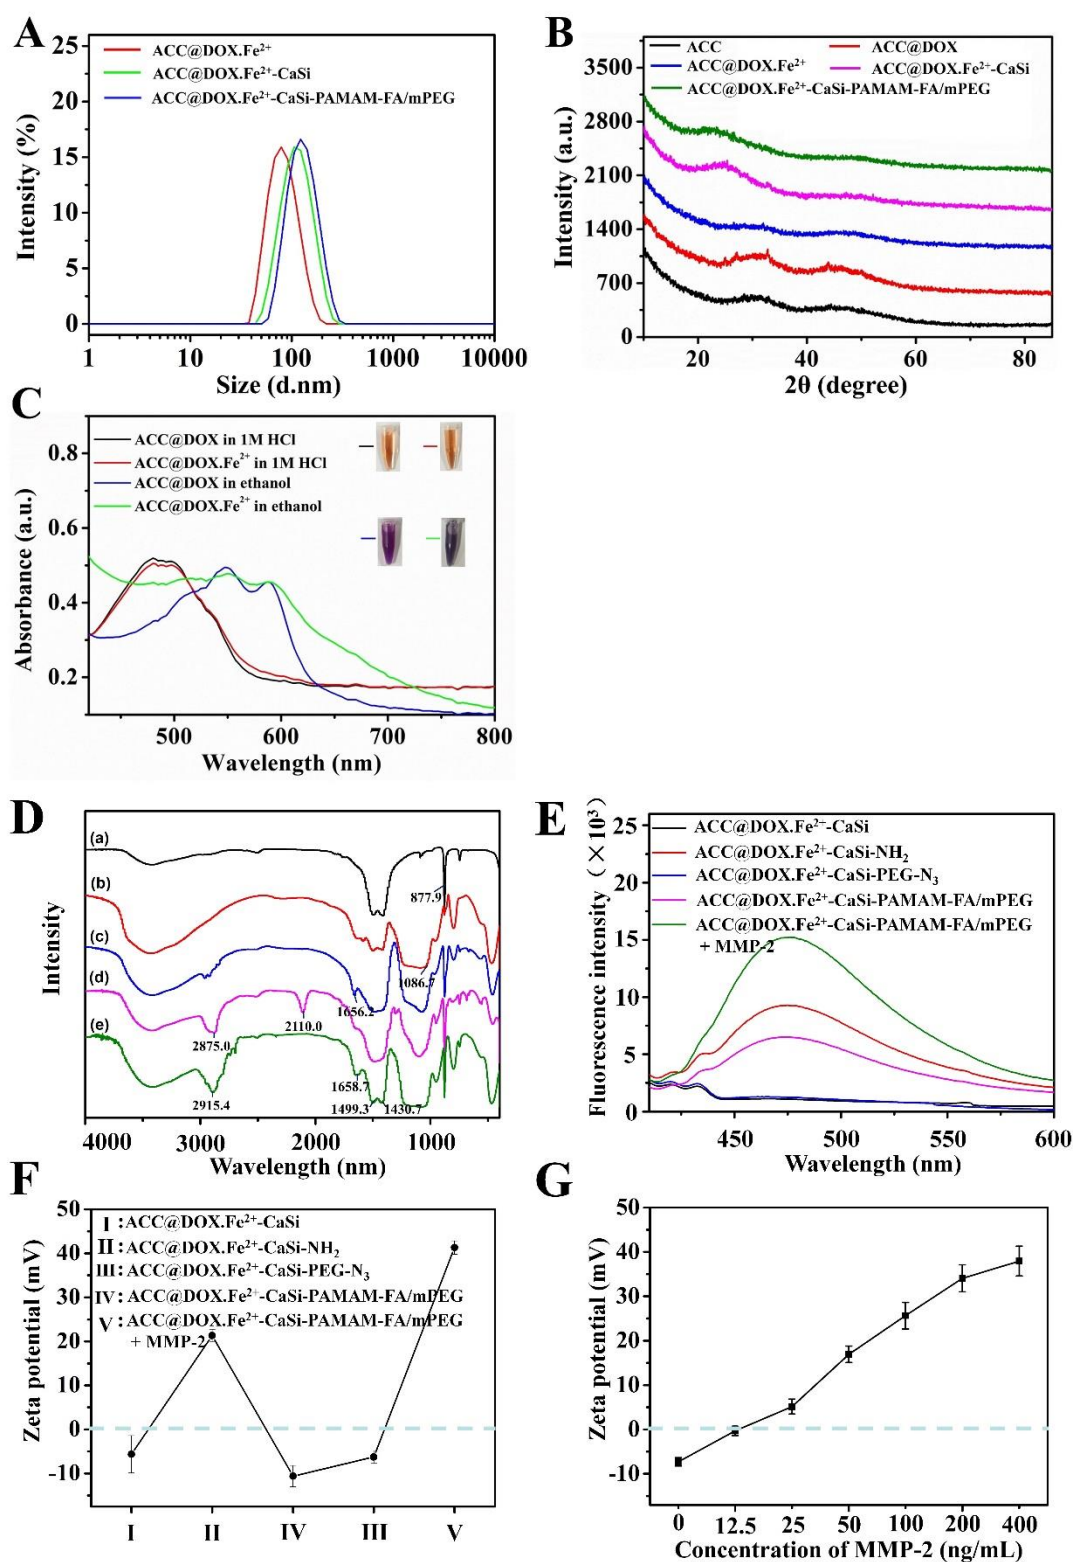

**Fig. S3. Characterizations on the physical and spectroscopic properties of the nanoformulation as well as its MMP-2 responsiveness.** **A:** The size distribution of ACC@DOX.Fe<sup>2+</sup>, ACC@DOX.Fe<sup>2+</sup>-CaSi and ACC@DOX.Fe<sup>2+</sup>-CaSi-PAMAM-FA/mPEG were characterized by DLS. **B:** XRD analysis of ACC, ACC@DOX, ACC@DOX.Fe<sup>2+</sup>, ACC@DOX.Fe<sup>2+</sup>-CaSi and ACC@DOX.Fe<sup>2+</sup>-CaSi-PAMAM-FA/mPEG. The missing peaks indicate that the nanoparticulate substrates are highly

amorphous. **C:** UV-vis spectra of ACC@DOX and ACC@DOX.Fe<sup>2+</sup> dissolved in 1M HCl or ethanol. **D:** FTIR spectra of (a) ACC@DOX.Fe<sup>2+</sup>, (b) ACC@DOX.Fe<sup>2+</sup>-CaSi, (c) ACC@DOX.Fe<sup>2+</sup>-CaSi-NH<sub>2</sub>, (d) ACC@DOX.Fe<sup>2+</sup>-CaSi-PEG-N<sub>3</sub> and (e) ACC@DOX.Fe<sup>2+</sup>-CaSi-PAMAM-FA/mPEG. The peak at 877.9cm<sup>-1</sup> confirmed the successful construction of the CaCO<sub>3</sub> nanostructure. After the coating of silica shells, a new peak has appeared at 1086.7cm<sup>-1</sup>, which was due to the stretching vibration of the Si-O bond. The silica coated ACC further reacted with APTES and resulted in the emergence of a new peak at 1656.2cm<sup>-1</sup>, which confirmed the successful grafting of amine groups. Subsequently, the amine-modified nanoparticles were grafted with PEG-N<sub>3</sub> and two new peaks appeared at 2110.0cm<sup>-1</sup> and 2875.0cm<sup>-1</sup>, which correspond to the azide and methylene groups on the PEG-N<sub>3</sub>, respectively. Eventually, after the conjugation of PAMAM-FA via click reactions, the azide peaks has disappeared as they were consumed during the reaction. Instead, two new peaks emerged near 1658.7cm<sup>-1</sup>, which was assigned to the amine groups on the folate moiety. Additionally, another two peaks have appeared at 1499.3cm<sup>-1</sup> and 1430.7cm<sup>-1</sup>, which also correspond to the aromatic rings of attached folate moieties. **E:** Fluorescamine spectra of the nanoparticles at different synthesis stages: ACC@DOX.Fe<sup>2+</sup>-CaSi, ACC@DOX.Fe<sup>2+</sup>-CaSi-NH<sub>2</sub>, ACC@DOX.Fe<sup>2+</sup>-CaSi-PEG-N<sub>3</sub>, ACC@DOX.Fe<sup>2+</sup>-CaSi-PAMAM-FA/mPEG, MMP-2-treated ACC@DOX.Fe<sup>2+</sup>-CaSi-PAMAM-FA/mPEG. **F:** Zeta potential changes of the nanoparticles at different synthesis stages: (I) ACC@DOX.Fe<sup>2+</sup>-CaSi, (II) ACC@DOX.Fe<sup>2+</sup>-CaSi-NH<sub>2</sub>, (III) ACC@DOX.Fe<sup>2+</sup>-CaSi-PEG-N<sub>3</sub>, (IV) ACC@DOX.Fe<sup>2+</sup>-CaSi-PAMAM-FA/mPEG, (V) MMP-2-treated ACC@DOX.Fe<sup>2+</sup>-CaSi-PAMAM-FA/mPEG. **G:** Zeta potential changes of ACC@DOX.Fe<sup>2+</sup>-CaSi-PAMAM-FA/mPEG after incubation with various concentrations of MMP-2 for 12 h.

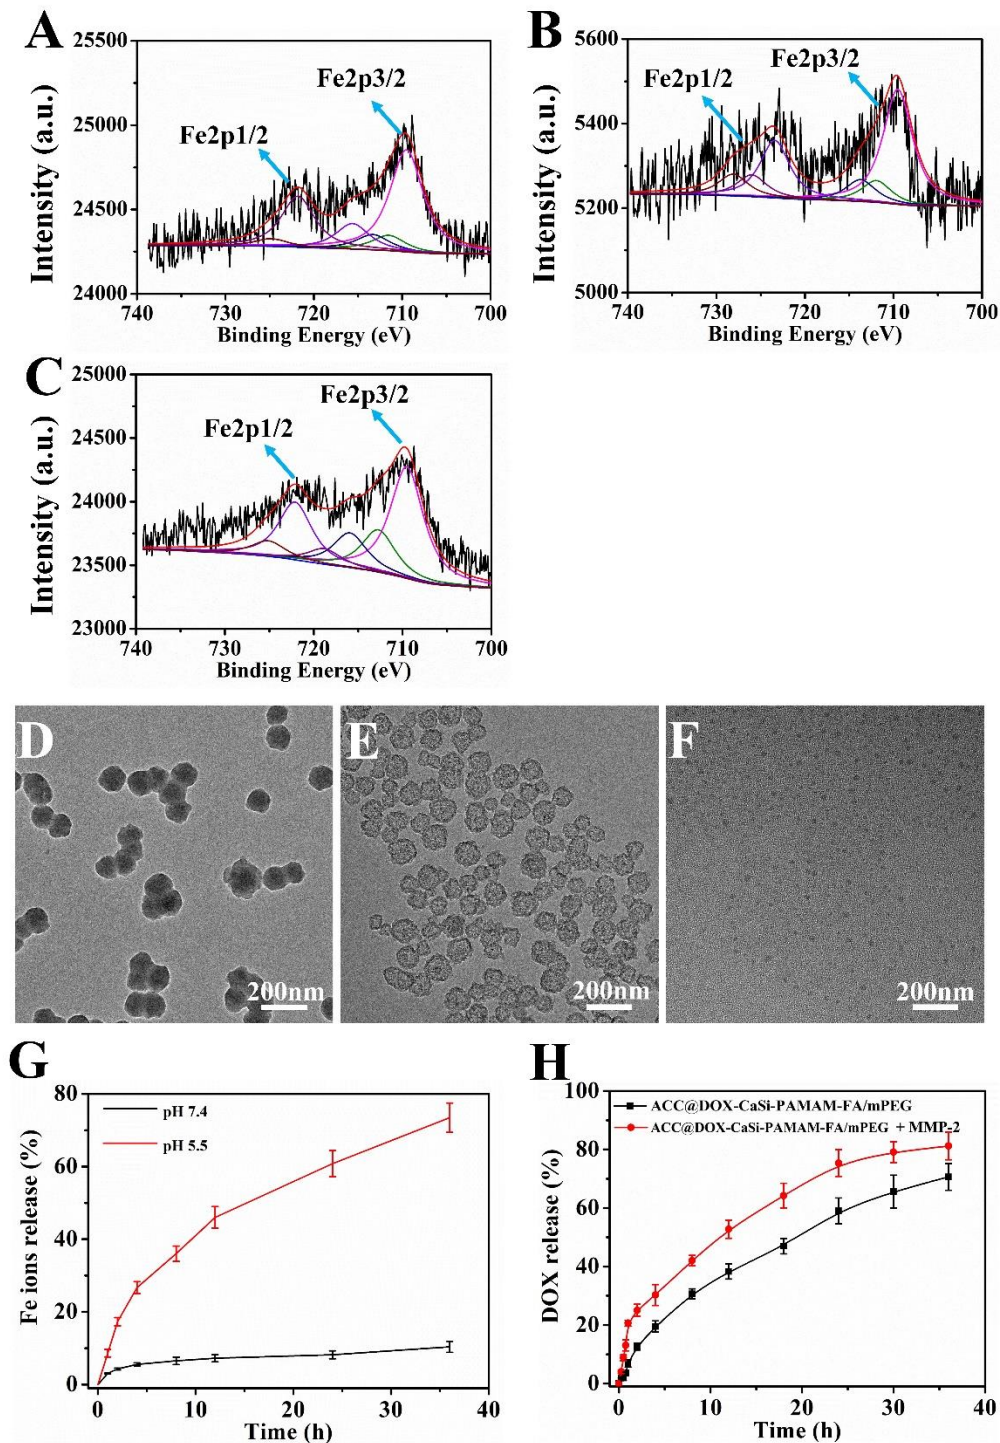

**Fig. S4. Fe<sup>2+</sup>-stabilizing effect and degradation-mediated drug release features of the ACC-based nanoformulation.** (A-C) XPS spectra for the Fe2p regions of ACC@DOX.Fe<sup>2+</sup>-CaSi-PAMAM-FA/mPEG incubated under incubation in (A) PBS, (B) cell medium, (C) serum for 24 h. (D) TEM image of ACC@DOX.Fe<sup>2+</sup>-CaSi-PAMAM-FA/mPEG after incubated at pH7.4 for 24h. (E) and (F) are the TEM images of ACC@DOX.Fe<sup>2+</sup>-CaSi-PAMAM-FA/mPEG after incubating at pH5.5 for 24h and 48 h, respectively. (G) The Fe release profiles from ACC@DOX.Fe<sup>2+</sup>-CaSi-PAMAM-FA/mPEG under pH 7.4 and pH 5.5, as measured by ICP assay. (H) The DOX release profiles from ACC@DOX-CaSi-PAMAM-FA/mPEG and MMP-2-treated ACC@DOX-CaSi-PAMAM-FA/mPEG under pH 5.5.

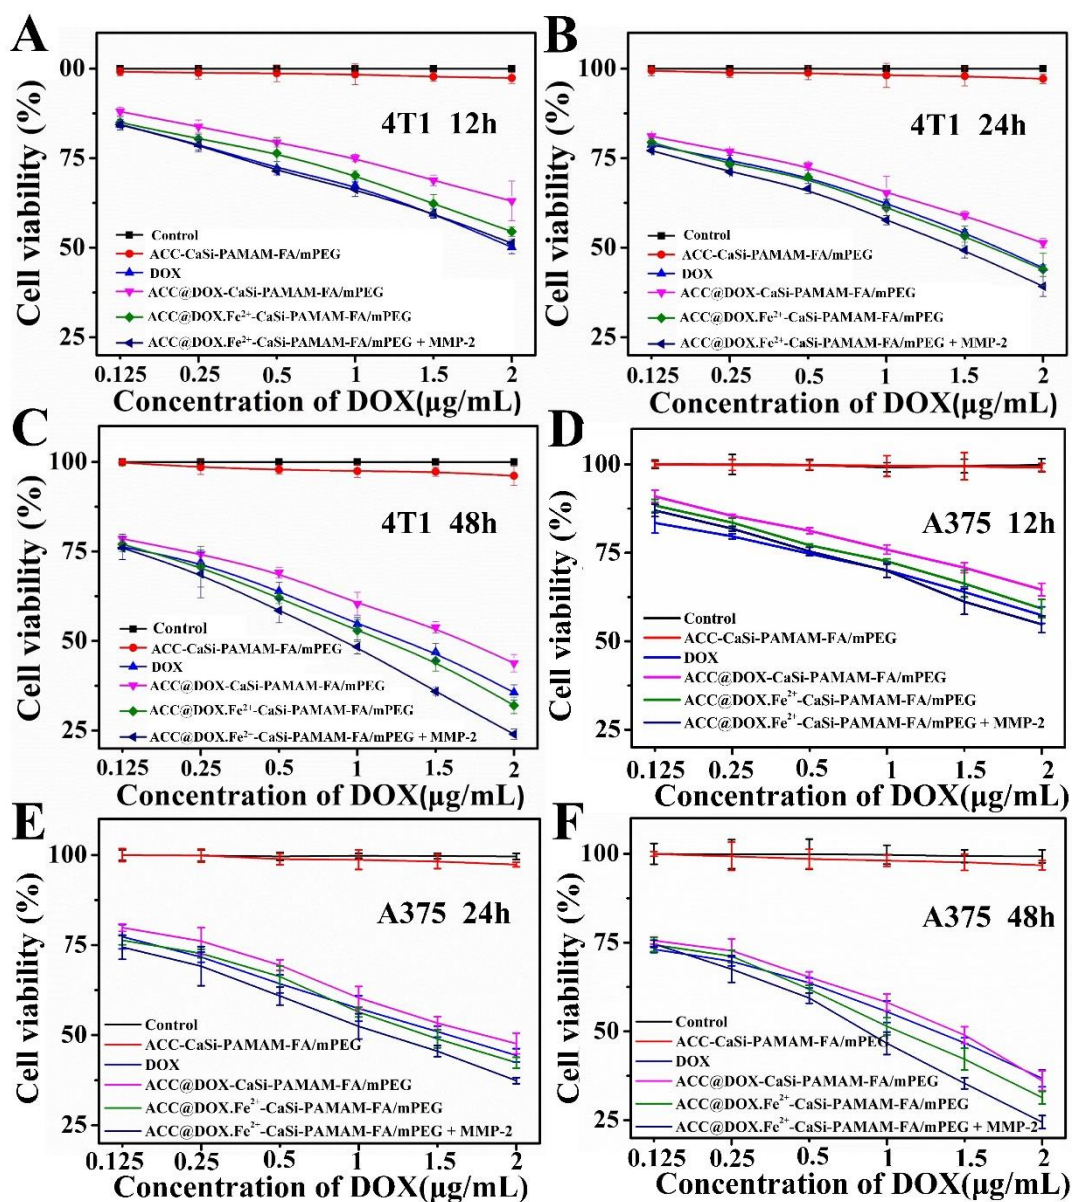

**Fig. S5.** Survival rates of 4T1 and A375 cells measured via MTT assay after incubation with PBS, ACC-CaSi-PAMAM-FA/mPEG, DOX, ACC@DOX-CaSi-PAMAM-FA/mPEG, ACC@DOX.Fe<sup>2+</sup>-CaSi-PAMAM-FA/mPEG and MMP-2 treated ACC@DOX.Fe<sup>2+</sup>-CaSi-PAMAM-FA/mPEG. Panel A/B/C were 4T1 cells while panel D/E/F were A375 cells. The incubation periods were 12 h (A, D), 24 h (B, E) and 48 h (C, F), respectively.



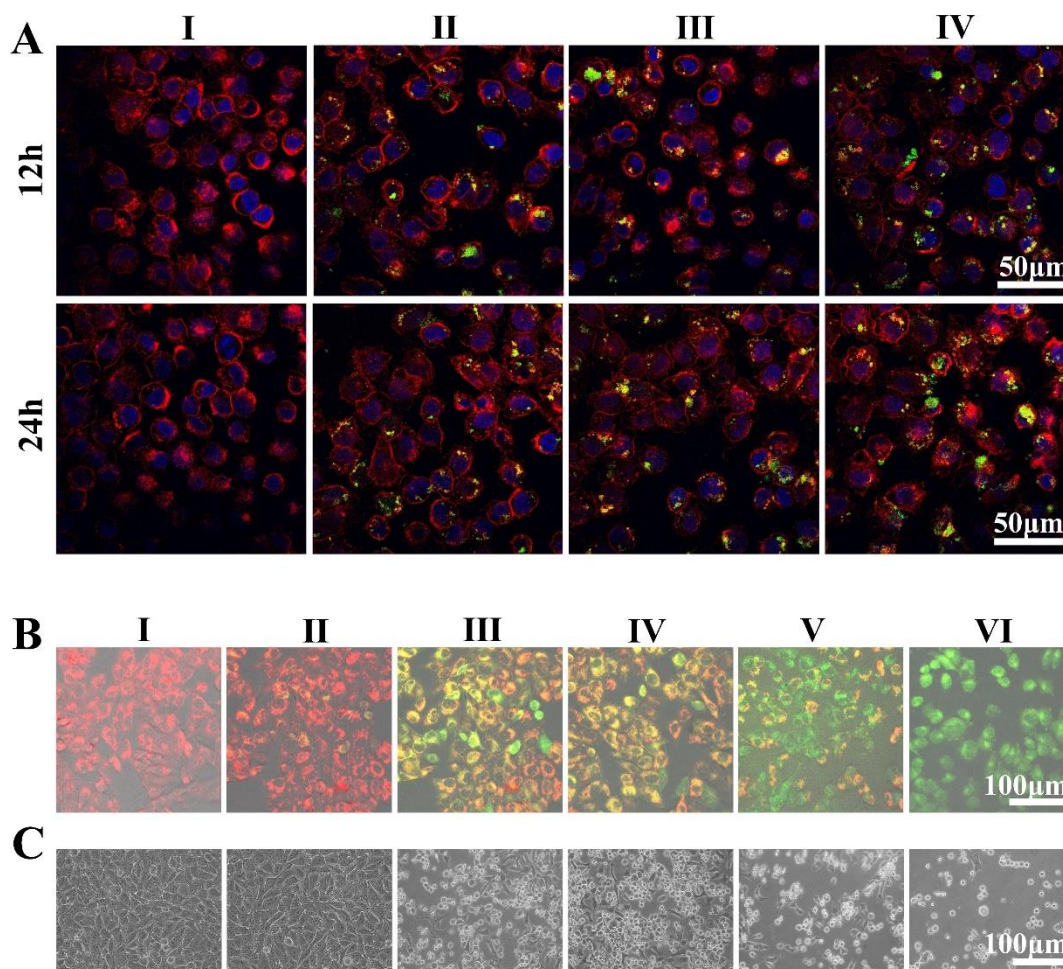

**Fig. S6. CLSM and bright-field microscopic analysis of A375 cells after treatment with different samples.** (A) CLSM images of A375 cells incubated with I: PBS, II: ACC@FITC-CaSi-PEG, III: ACC@FITC-CaSi-PAMAM-FA/mPEG and IV: MMP-2-treated ACC@FITC-CaSi-PAMAM-FA/mPEG for 12 h and 24 h. The blue, red and green colors indicate cell nucleus, cell membrane and the FITC-labelled nanoparticles, respectively. (B) CLSM observations on the changes in the mitochondrial membrane potential of A375 cells after incubation with PBS (I), ACC-CaSi-PAMAM-FA/mPEG (II), DOX (III), ACC@DOX-CaSi-PAMAM-FA/mPEG (IV) and MMP-2 treated ACC@DOX.Fe<sup>2+</sup>-CaSi-PAMAM-FA/mPEG (V) for 24h. (C) Bright-field microscopy images of A375 cells after incubation with I: PBS, II: ACC-CaSi-PAMAM-FA/mPEG, III: DOX, IV: ACC@DOX-CaSi-PAMAM-FA/mPEG, V: ACC@DOX.Fe<sup>2+</sup>-CaSi-PAMAM-FA/mPEG and VI: MMP-2 treated ACC@DOX.Fe<sup>2+</sup>-CaSi-PAMAM-FA/mPEG for 24 h.

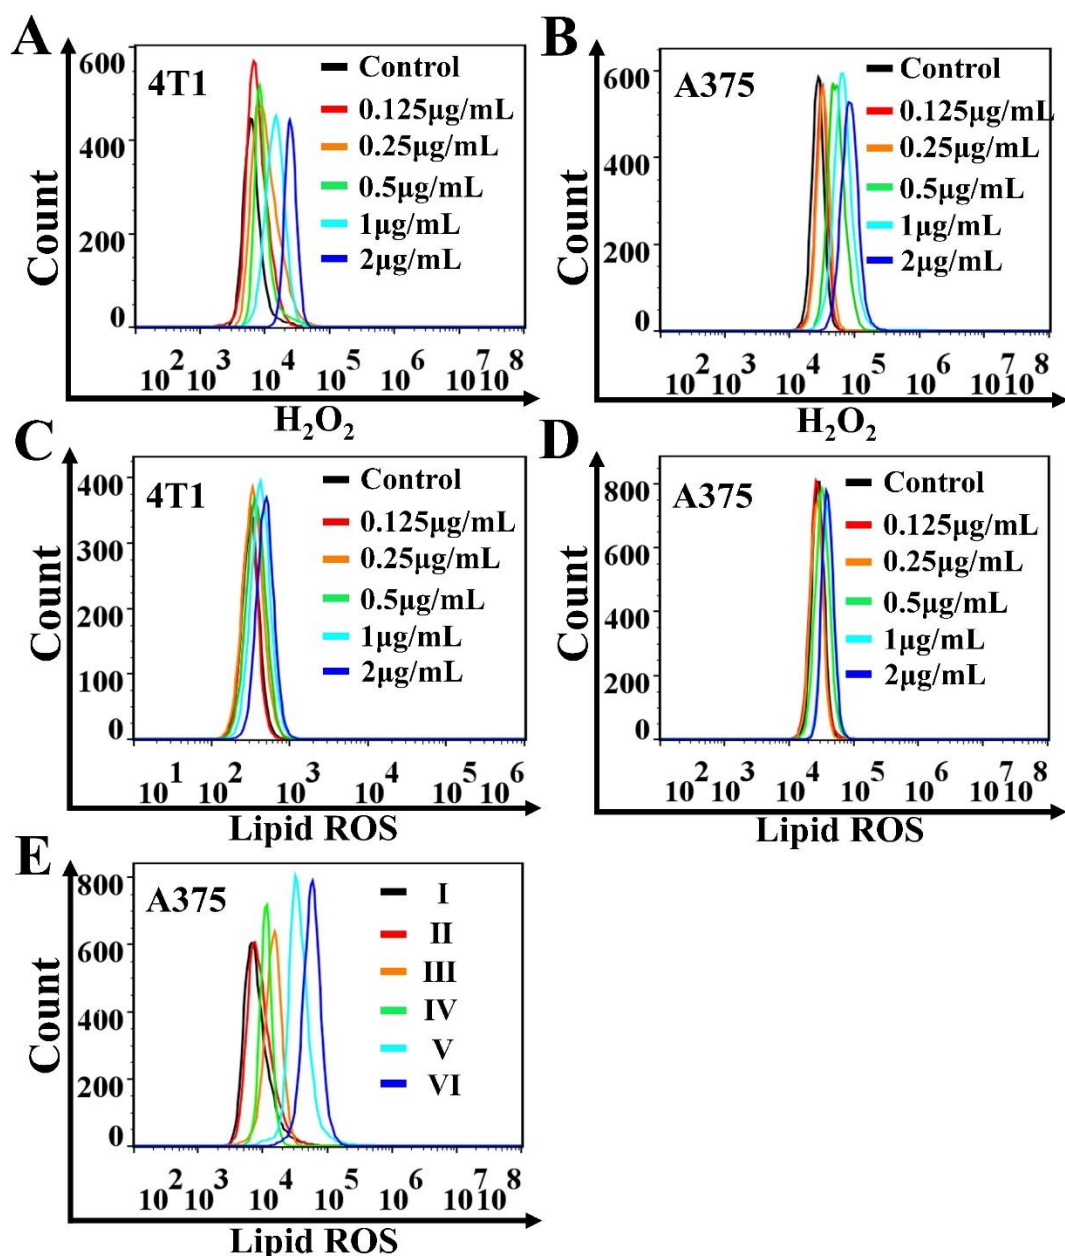

**Fig. S7. Changes in the intracellular  $H_2O_2$  and lipid ROS levels in 4T1 and A375 cells after different treatments.** Panel (A) and (B) showed the flow cytometric analysis on the intracellular  $H_2O_2$  levels in (A) 4T1 and (B) A375 cells after incubation with varied concentrations of DOX for 24 h. Panel (C) and (D) were the flow cytometric results on the intracellular lipoperoxide levels in 4T1 and A375 cells incubated with varied concentrations of DOX for 24 h, respectively. (E) Flow cytometric analysis on the intracellular lipoperoxide levels in A375 cells incubated with I: PBS, II: ACC-CaSi-PAMAM-FA/mPEG, III: DOX, IV: ACC@DOX-CaSi-PAMAM-FA/mPEG, V: ACC@DOX. $Fe^{2+}$ -CaSi-PAMAM-FA/mPEG and VI: MMP-2 treated ACC@DOX. $Fe^{2+}$ -CaSi-PAMAM-FA/mPEG for 24 h. The lipid ROS indicator in this test was BODIPY-C11.

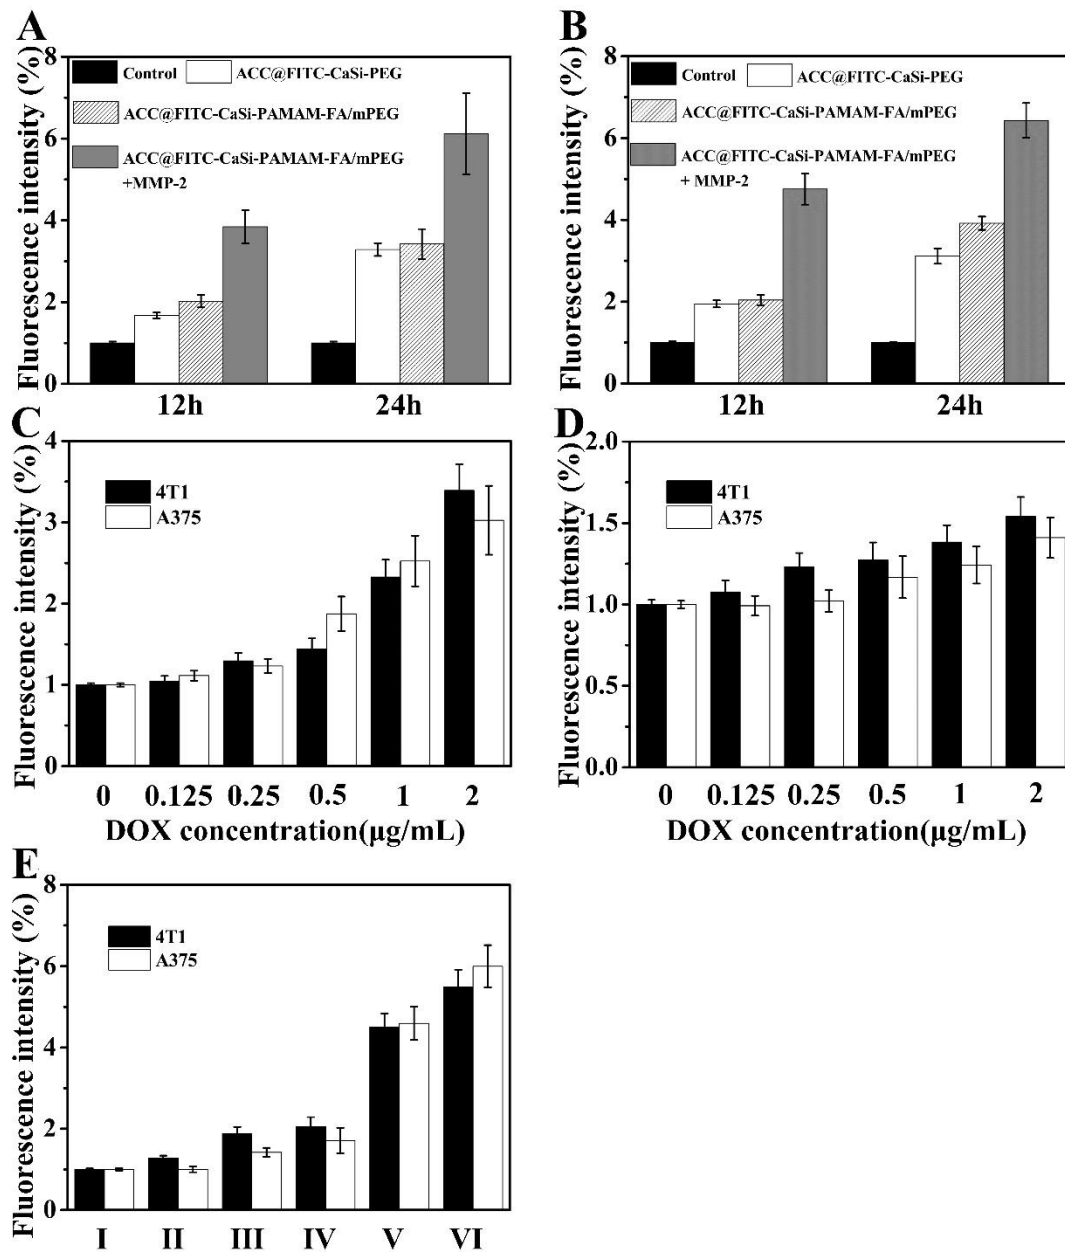

**Fig. S8. Quantitative analysis on the uptake, H<sub>2</sub>O<sub>2</sub> and lipid ROS levels in 4T1 and A375 cells after various treatments.** Quantitative flow cytometric analysis on the FITC fluorescence of (A) 4T1 and (B) A375 cells after the incubation with I: PBS, II: ACC@FITC-CaSi-PEG, III: ACC@FITC-CaSi-PAMAM-FA/mPEG and IV: MMP-2-treated ACC@FITC-CaSi-PAMAM-FA/mPEG for 12 h and 24 h. C: Quantitative flow cytometric analysis on the intracellular H<sub>2</sub>O<sub>2</sub> levels in 4T1 and A375 cells after incubation with varied concentrations of DOX for 24 h. (D) Flow cytometric analysis on the intracellular lipoperoxide levels in 4T1 and A375 cells incubated with varied concentrations of DOX for 24 h. (E) Flow cytometric analysis on the intracellular lipoperoxide levels in A375 cells incubated with I: PBS, II: ACC-CaSi-PAMAM-FA/mPEG, III: DOX, IV: ACC@DOX-CaSi-PAMAM-FA/mPEG, V: ACC@DOX.Fe<sup>2+</sup>-CaSi-PAMAM-FA/mPEG and VI: MMP-2 treated ACC@DOX.Fe<sup>2+</sup>-CaSi-PAMAM-FA/mPEG for 24 h.

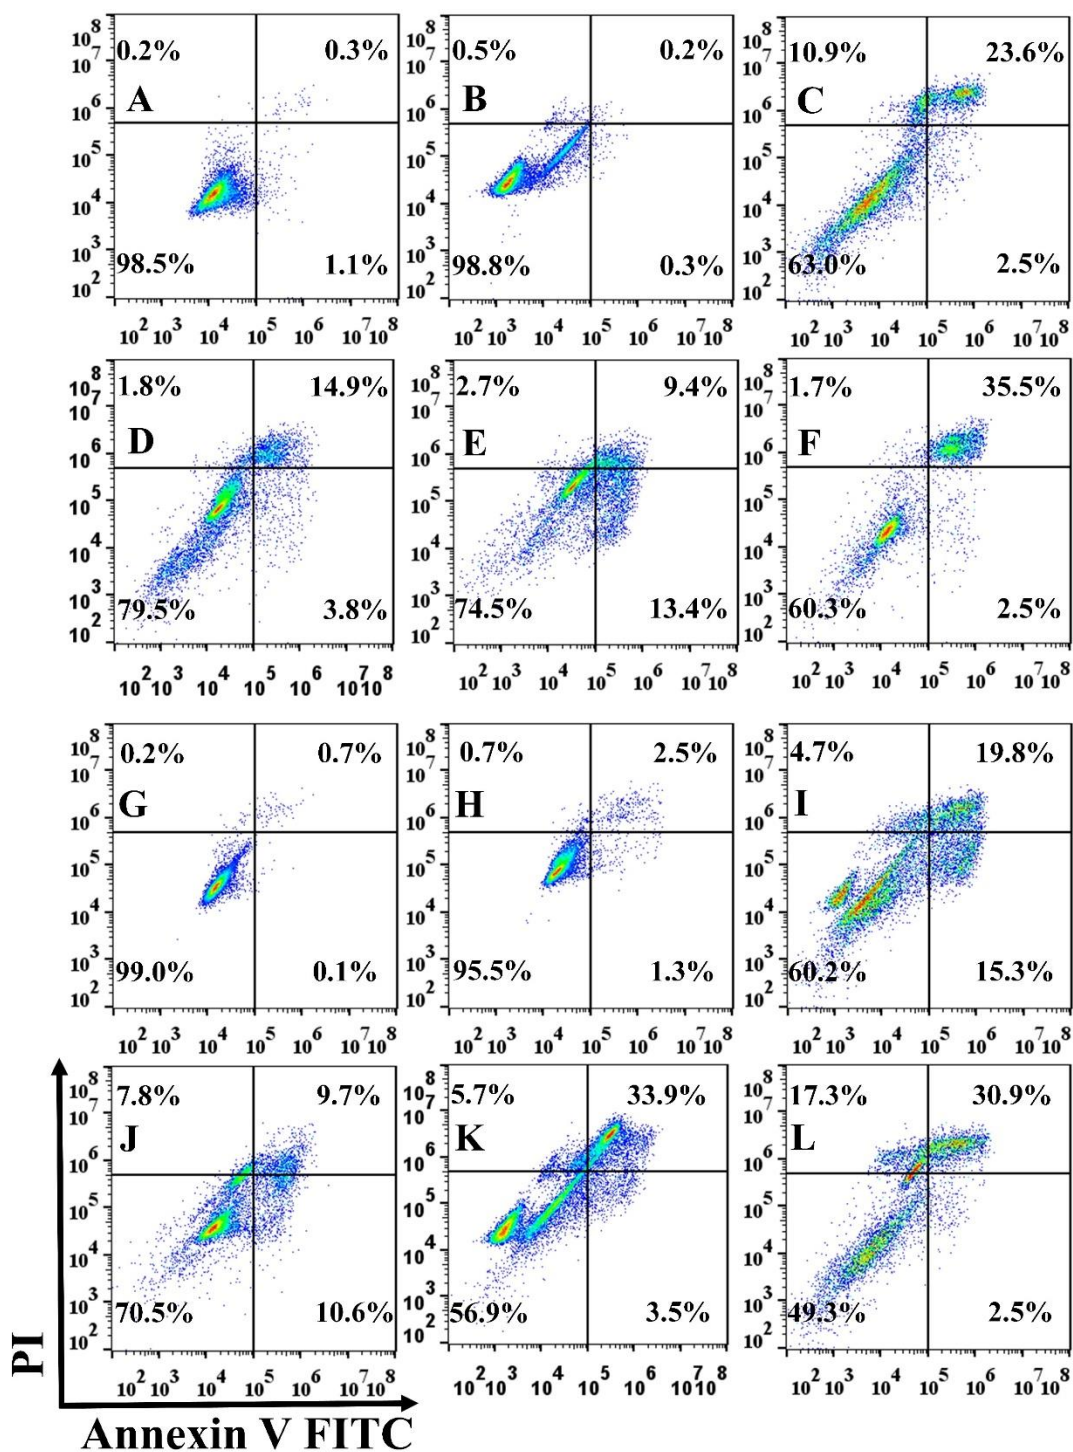

**Fig. S9. Flow cytometric analysis on the apoptosis levels of A375 cells after different treatments.** The incubation conditions are: (A) PBS, (B) ACC-CaSi-PAMAM-FA/mPEG, (C) DOX, (D) ACC@DOX-CaSi-PAMAM-FA/mPEG, (E)ACC@DOX.Fe<sup>2+</sup>-CaSi-PAMAM-FA/mPEG and (F) MMP-2 treated ACC@DOX.Fe<sup>2+</sup>-CaSi-PAMAM-FA/mPEG for 12 h. The corresponding results after 24 h were shown in panel G-L, respectively.

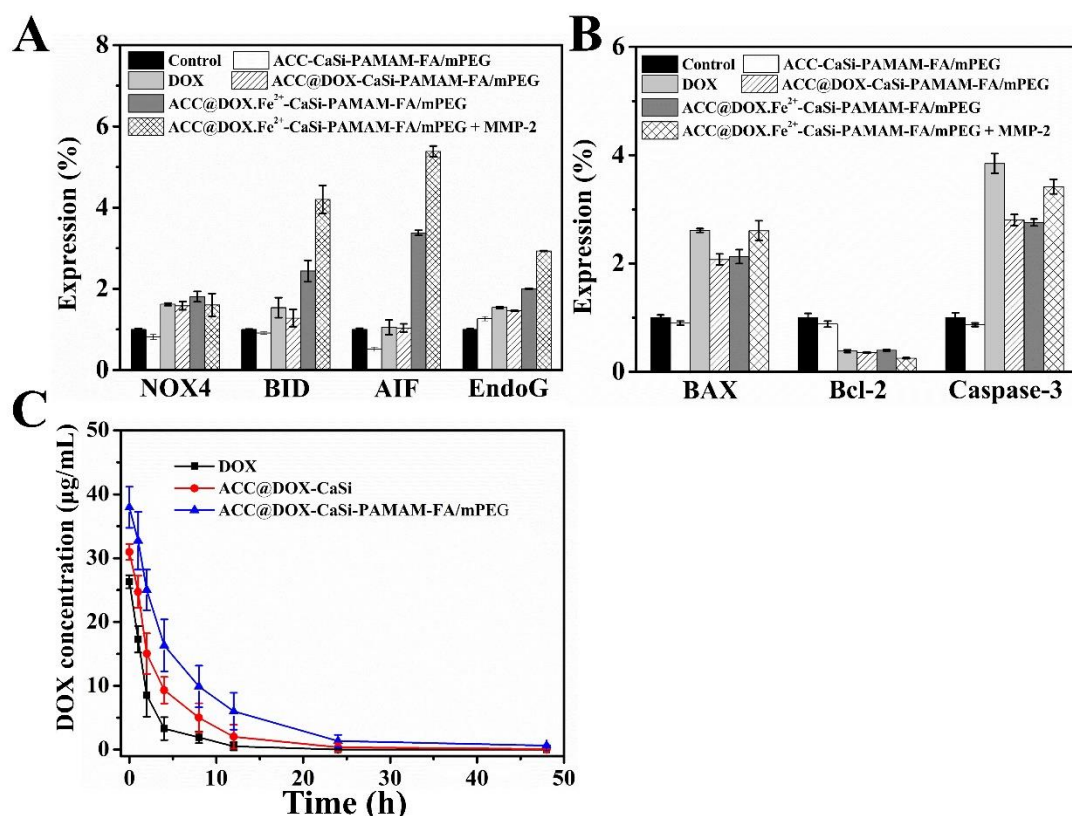

**Fig. S10. Expression levels of key ferroptosis/apoptosis markers in vitro after different treatments and the blood stability of the nanoformulation in vivo. A-B:** Quantitative analysis of the western blot results on the expression levels of ferroptosis and apoptosis markers in 4T1 cells after incubation with PBS, ACC-CaSi-PAMAM-FA/mPEG, DOX, ACC@DOX-CaSi-PAMAM-FA/mPEG and MMP-2 treated ACC@DOX.Fe<sup>2+</sup>-CaSi-PAMAM-FA/mPEG for 24 h. **C:** Changes in the blood concentration of DOX, ACC@DOX-CaSi, ACC@DOX-CaSi-PAMAM-FA/mPEG in mouse over time (n=3). All samples were administered via intravenous injection.

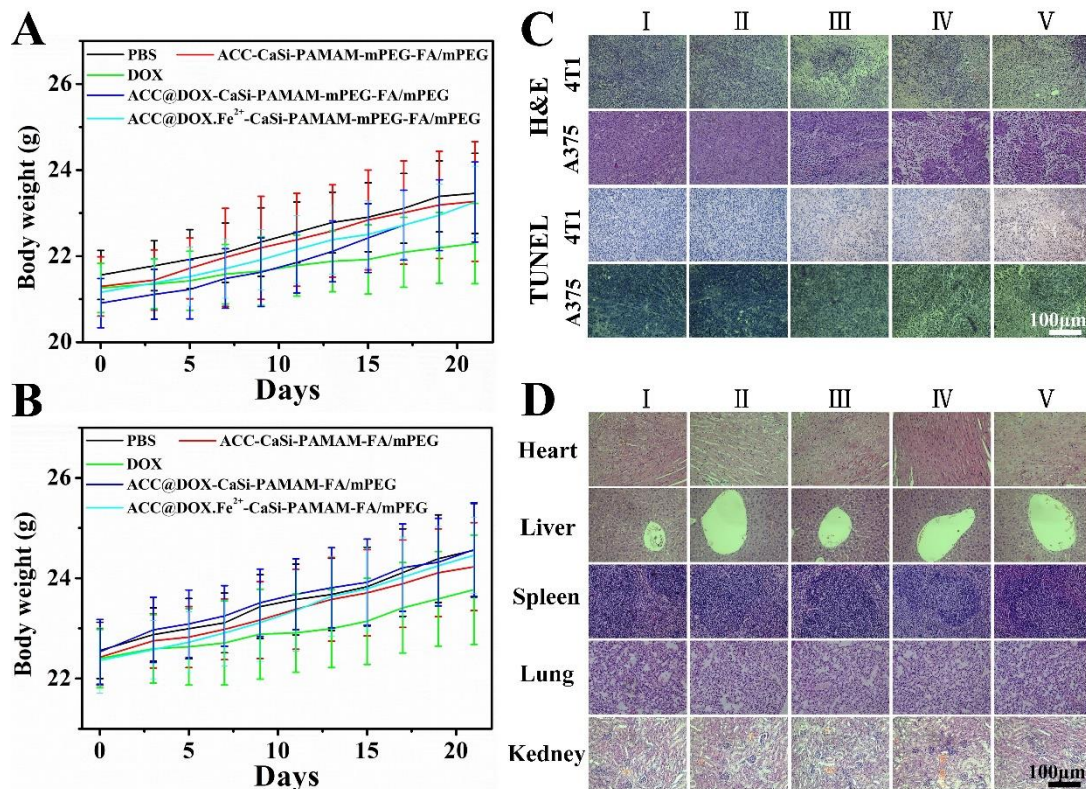

**Fig. S11. Body weight changes of mice after different treatments and the corresponding histological analysis.** A-B: Changes in the average body weight of tumor-bearing mice through the 21-day treatment period, which were recorded every 2 days (A: 4T1, B: A375). C: Histological analysis of the tumor slices under after H&E and TUNEL staining. I: PBS, II: ACC-CaSi-PAMAM-FA/mPEG, III: DOX, IV: ACC@DOX-CaSi-PAMAM-FA/mPEG and V: ACC@DOX.Fe<sup>2+</sup>-CaSi-PAMAM-FA/mPEG. D: Histological analysis of the major organs (heart, liver, spleen, lung, kidney) extracted from 4T1-tumor bearing mice after the 21-day treatment, for which the organ slices were processed for H&E staining. I: PBS, II: ACC-CaSi-PAMAM-FA/mPEG, III: DOX, IV: ACC@DOX-CaSi-PAMAM-FA/mPEG, V: ACC@DOX.Fe<sup>2+</sup>-CaSi-PAMAM-FA/mPEG.
